# Supplementary material for: Single-chirality single-wall carbon nanotubes for electrochemical biosensing
Source: Royal Society of Chemistry journal article supplement (doi:10.1039/d4cp04206a), 2025-01-01
Supplement: d4cp04206a1.pdf [file d4cp04206a1.pdf]

## Supporting Information for Single-chirality single-wall carbon nanotubes for electrochemical biosensing

Ju-Yeon Seo<sup>1</sup>, Bahar Mostafiz<sup>1</sup>, Xiaomin Tu<sup>3</sup>, Constantine Y. Khripin<sup>3</sup>, Ming Zheng<sup>3</sup>, Han Li<sup>1,2</sup>,  
Emilia Peltola<sup>1</sup>

1. Department of Mechanical and Materials Engineering, University of Turku, Turku, FI-20014,  
Finland

2. Turku Collegium for Science, Medicine and Technology, University of Turku, Turku, FI-20520,  
Finland

3. Materials Science and Engineering Division, National Institute of Standard and Technology,  
Gaithersburg, MD, 20899, USA

*Certain equipment, instruments or materials are identified in this paper in order to adequately specify the experimental details. Such identification does not imply recommendation by the National Institute of Standards and Technology (NIST), nor does it imply the materials are necessarily the best available for the purpose.*

### Table of Contents

|                                                                              |    |
|------------------------------------------------------------------------------|----|
| A. Methods for fabrication of electrochemical sensors .....                  | 2  |
| B. SEM images of SWCNT drop casted SPCEs.....                                | 2  |
| C. XPS spectra .....                                                         | 3  |
| D. Four-point probe measurements.....                                        | 3  |
| E. Density determination of (6,5) and (6,6) SWCNTs .....                     | 3  |
| F. Film thickness comparison using AFM.....                                  | 6  |
| G. Concentration study of (6,5) and (6,6) SWCNTs thin film/SPCEs .....       | 7  |
| H. SWCNTs drop casted SPCEs.....                                             | 8  |
| I. SWCNTs thin film/SPCEs.....                                               | 9  |
| J. Electron transfer kinetics of (6,6) and (6,5) SWCNTs thin film/SPCEs..... | 9  |
| K. Calibration plots of (6,6) and (6,5) SWCNTs thin film/SPCEs.....          | 10 |

## A. Methods for fabrication of electrochemical sensors

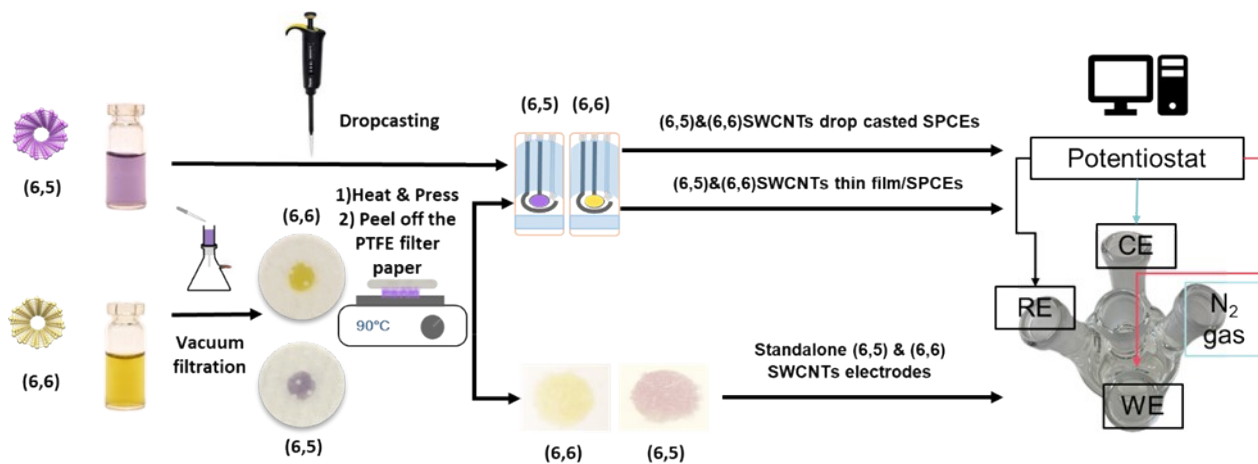

Figure S1. The steps to prepare the electrochemical sensors for use as the working electrode (WE) using screen-printed carbon electrodes (SPCEs) and glass (standalone) as substrates

## B. SEM images of SWCNT drop casted SPCEs

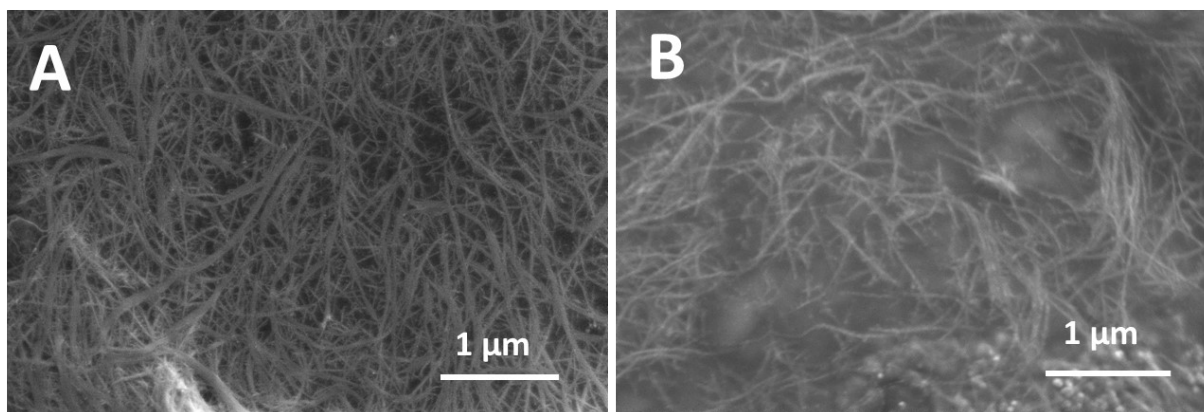

Figure S2. A. (6,5) SWCNTs drop casted SPCE and B. (6,6) SWCNTs drop casted SPCE.

### C. XPS spectra

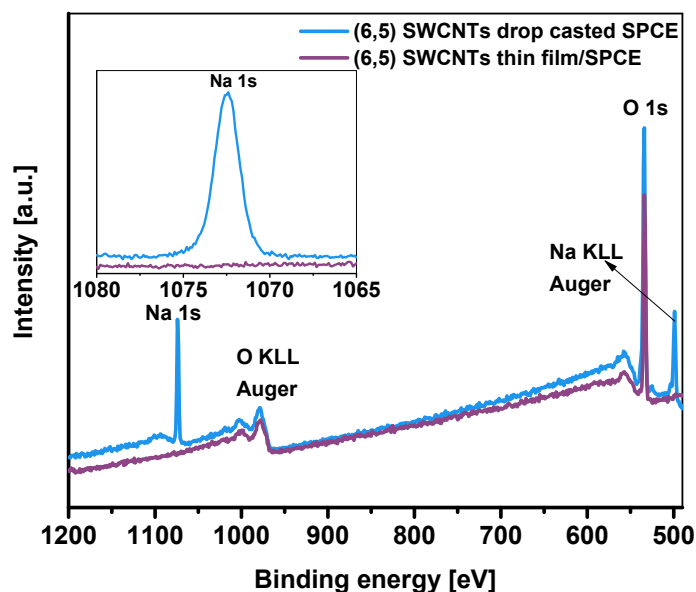

Figure S3. XPS spectra of (6,5) SWCNTs drop casted SPCE and thin film/SPCE

### D. Four-point probe measurements

Table S1. Sheet resistance, resistivity, and conductivity for standalone single-chirality SWCNTs electrodes ( $n=3$ ). The standard deviation was calculated using three data points.

| Sensor                            | Mean Sheet Resistance ( $\Omega/\text{sq}$ ) | Mean Resistivity ( $\Omega\cdot\text{m}$ ) | Mean Conductivity (S/m) |
|-----------------------------------|----------------------------------------------|--------------------------------------------|-------------------------|
| standalone (6,5) SWCNTs electrode | $1387311 \pm 295401$                         | $0.28 \pm 0.06$                            | $3.73 \pm 0.91$         |
| standalone (6,6) SWCNTs electrode | $4868 \pm 1586$                              | $0.0010 \pm 0.0003$                        | $1092 \pm 300$          |

The sheet resistance ( $R_s$ ) was calculated from the equation,  $R_s = \frac{\rho}{t}$  (1) where  $\rho$  is the resistivity and  $t$  is the sample thickness. The conductivity ( $\sigma_s$ ) was calculated from the equation,  $\sigma_s = \frac{1}{R_s \times t}$  (2).

## E. Density determination of (6,5) and (6,6) SWCNTs

The method used to determine the extinction coefficient of (6,6) and (6,5) SWCNTs follows the protocol established previously by Khriprin et al.<sup>1</sup> The SWCNTs were dispersed in water using a single-stranded DNA oligomer (GT)<sub>20</sub>. Next, the SWCNTs were separated into fractions based on their length by size exclusion chromatography (SEC). This process also removes unbound DNA. The mass ratio of DNA: SWCNT carbon concentration in their length-fractionated samples was found to be constant by X-ray photon spectroscopy (XPS). Therefore, after unbound DNA was removed, the measured DNA concentration can be used to calculate the SWCNT carbon concentration. To quantify DNA on purified DNA-wrapped (6,5) and (6,6), the DNA-SWCNTs are run through SEC using 1% sodium deoxycholate (DOC) as the mobile phase to separate the DNA from (DOC-coated) SWCNTs. The DNA peak in the recorded SEC chromatogram is then used for DNA quantification according to a predetermined calibration.

### 1. Beer-Lambert law

$$A = \epsilon l [\text{SWCNTs}]$$

$$A = \text{Absorbance or Optical density (OD)}$$

$$\epsilon = \text{Molar extinction coefficient (M}^{-1}\text{cm}^{-1}\text{)}$$

$$[\text{SWCNTs}] = \text{SWCNT carbon concentration (M)}$$

$$l = \text{Path length (cm)}$$

Using the measured DNA concentration and the known DNA mass ratio (n), we have  $[\text{SWCNTs}] = n [\text{DNA}]$ .

Thus, the  $\epsilon$  can be determined by:

$$\epsilon = \frac{l \cdot n [\text{DNA}]}{A}$$

**Table S2. Extinction Coefficient for (6,5) and (6,6) SWCNTs determined by this work.**

| <b>(n,m)</b> | <b>[SWCNT]/1 OD at M<sub>11</sub> or S<sub>11</sub></b> | <b>Extinction Coefficient at M<sub>11</sub> or S<sub>11</sub></b> |
|--------------|---------------------------------------------------------|-------------------------------------------------------------------|
| (6,5)        | 3.7 ± 1 μg/mL                                           | 3200 M <sup>-1</sup> cm <sup>-1</sup> /C atom                     |
| (6,6)        | 13 ± 1 μg/mL                                            | 920 M <sup>-1</sup> cm <sup>-1</sup> /C atom                      |

## 2. Working area

- Diameter of the working electrode (cm) = 0.4  
Thus, WE Area (cm<sup>2</sup>) = 0.126
- Inner diameter of filtration film (cm) = 1.8, Outer diameter of filtration film (cm) = 2.5  
Thus, *PTFE Membrane filter working area* (cm<sup>2</sup>) = π × (1.8)<sup>2</sup> = 2.545

## 3. Density of (6,5) SWCNTs (μg/cm<sup>2</sup>)

$$= \frac{[(6,5) \text{ SWCNTs}] \left( \frac{\mu\text{g}}{\text{mL}} \right)}{1 \text{ OD at } S_{11}} \times 1 \text{ OD} \times \text{Volume of the solution (mL)} \div [\text{WE area or } f]$$

### 1) OD of (6,5) SWCNTs = 0.319 (absorbance at 989 nm taken from Figure 1)

- Dilution factor for UV-Vis = 100 times  
Thus, 1 OD = 31.9

### 2) Standalone electrode

- Volume of the solution (mL) = 0.04 mL  
Thus, the density on the standalone electrode = 1.86 μg/cm<sup>2</sup>

### 3) SWCNT drop casted SPCE and SWCNT thin film/SPCEs

- Volume of the solution (mL) = 0.002 mL

Thus, the density of the SWCNTs drop casted SPCEs or SWCNTs thin film/SPCEs = 1.88  $\mu\text{g}/\text{cm}^2$

#### 4. Density of (6,6) SWCNTs ( $\mu\text{g}/\text{cm}^2$ )

$$= \frac{[(6,6) \text{ SWCNT}] \left( \frac{\mu\text{g}}{\text{mL}} \right)}{1OD \text{ at } M_{11} (\text{cm}^2)} \times 1 \text{ OD} \times \text{Volume of the solution (mL)} \div [\text{WE area or filter area}]$$

##### 1) OD of (6,6) SWCNTs = 0.2654 (absorbance at 456nm taken from Figure 1)

- Dilution factor for UV-Vis = 10 times

Thus, 1 OD = 2.654

##### 2) Standalone electrode

- The volume of the solution used (mL) = 0.136 mL

Thus, the density of the standalone electrode = 1.84  $\mu\text{g}/\text{cm}^2$

##### 3) SWCNTs drop casted SPCE and SWCNTs thin film/SPCEs

- The volume of the solution used (mL) = 0.00675 mL

Thus, the density of SWCNTs drop casted SPCEs or SWCNTs thin film/SPCEs = 1.85  $\mu\text{g}/\text{cm}^2$

#### F. Film thickness comparison using AFM

Table S3. 2  $\mu\text{g}/\text{cm}^2$  thickness comparison of standalone (6,5) SWCNTs and (6,6) SWCNTs electrodes (n=3).

The standard deviation was calculated using three data points.

| Sensor                            | Thickness (nm) |
|-----------------------------------|----------------|
| Standalone (6,5) SWCNTs electrode | 44.4 $\pm$ 4.7 |

Standalone (6,6)  
SWCNTs electrode  $41.5 \pm 13.6$

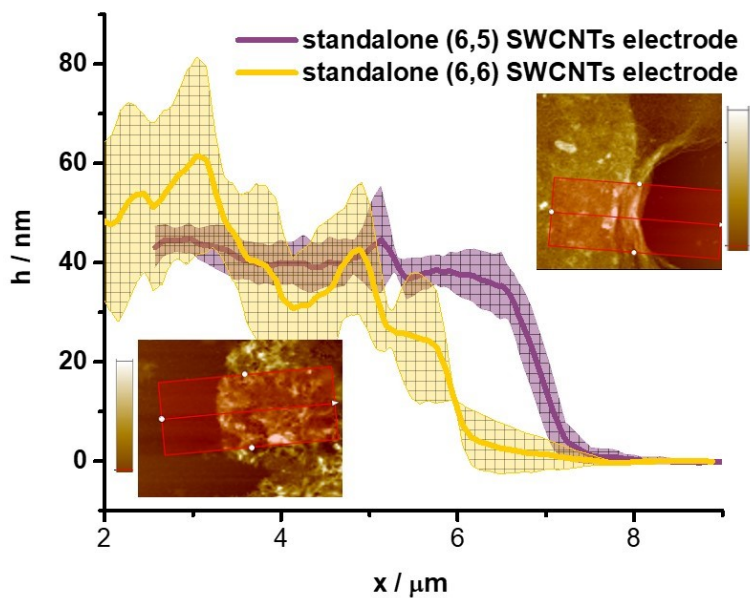

Figure S4.  $2 \mu\text{g}/\text{cm}^2$  thickness comparison of (6,5) SWCNTs in purple and (6,6) SWCNTs in yellow ( $n=3$ ),  
The legend shows a height range from 0 to 50 nm for (6,5) SWCNTs film (right) and from 0 to 80 nm for (6,6)  
SWCNTs film (left) in the AFM images.

### G. Concentration study of (6,5) and (6,6) SWCNTs thin film/SPCEs

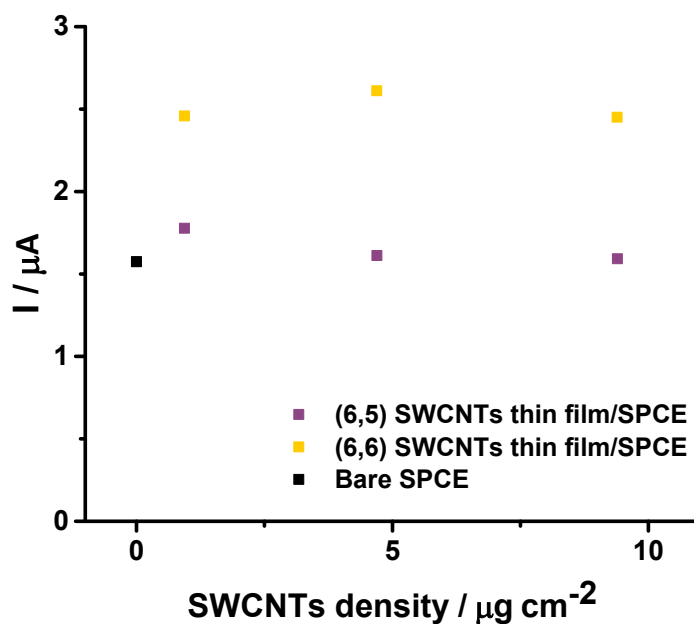

Figure S5. Peak anodic current ( $i_{p,a}$ ) by different densities of SWCNTs thin film/SPCEs

towards DA 50  $\mu\text{M}$  at a scan rate of 400 mV/s.

Based on this concentration study of SWCNTs, modifying the SPCEs does not require a higher density over  $2 \mu\text{g}/\text{cm}^2$ . Considering that the standalone electrodes give a stable current with a SWCNT density of  $2 \mu\text{g}/\text{cm}^2$ , nearly  $2 \mu\text{g}/\text{cm}^2$  is used for SPCE modification.

### H. SWCNTs drop casted SPCEs

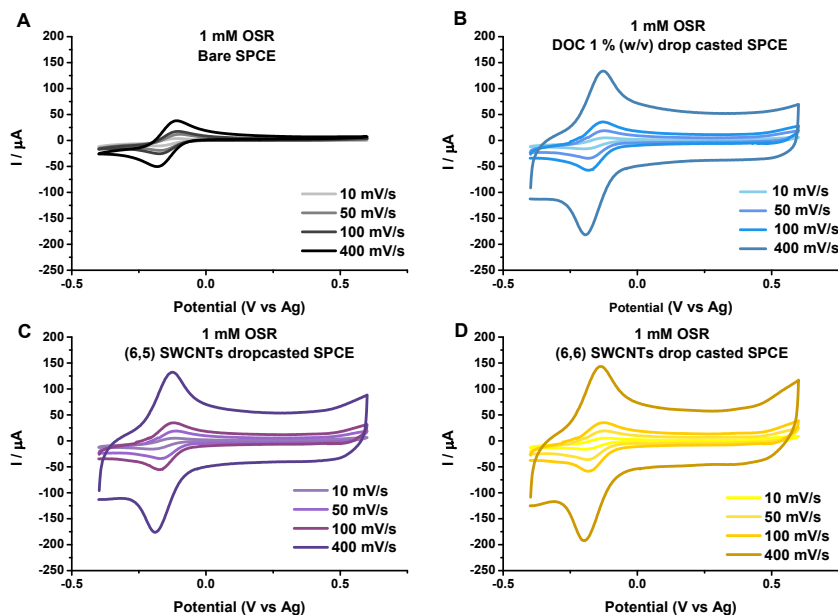

Figure S6. Comparison between bare and SWCNTs drop casted SPCEs towards OSR concentration of 1 mM.

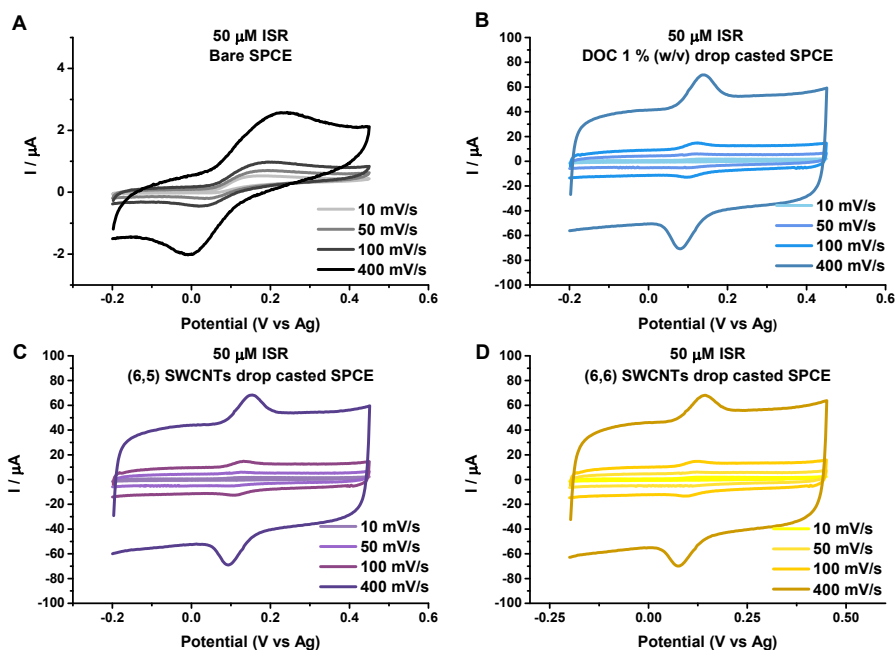

Figure S7. Comparison between bare and SWCNTs drop casted SPCEs towards ISR concentration of 50  $\mu\text{M}$ .



## I. SWCNTs thin film/SPCEs

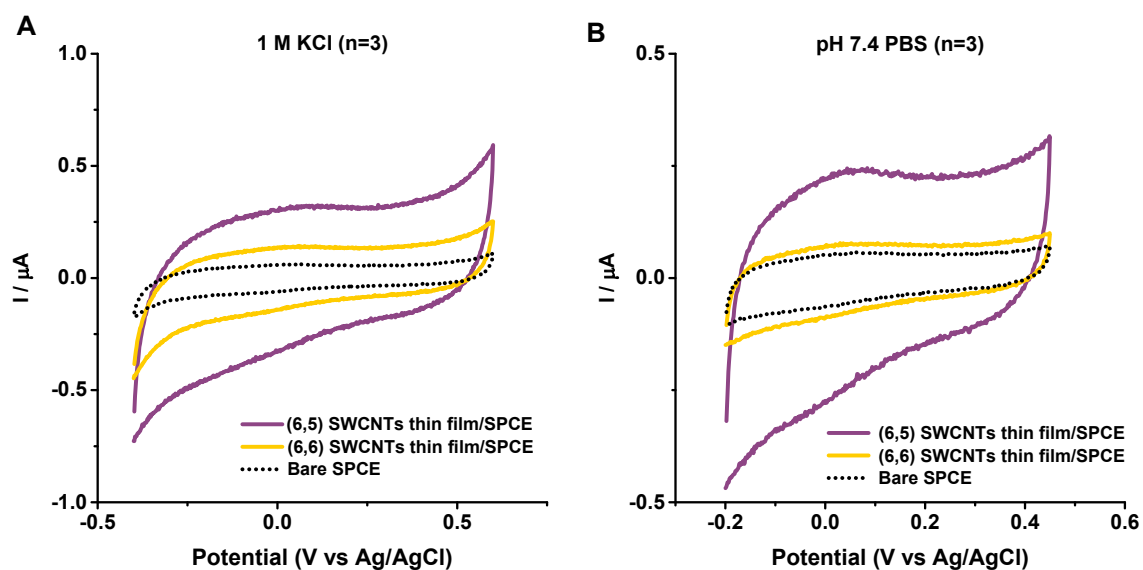

Figure S8. Cyclic voltammograms with a scan rate of 100 mV/s in (A) 1 M KCl and (B) pH 7.4 PBS.

## J. Electron transfer kinetics of (6,6) and (6,5) SWCNTs thin film/SPCEs

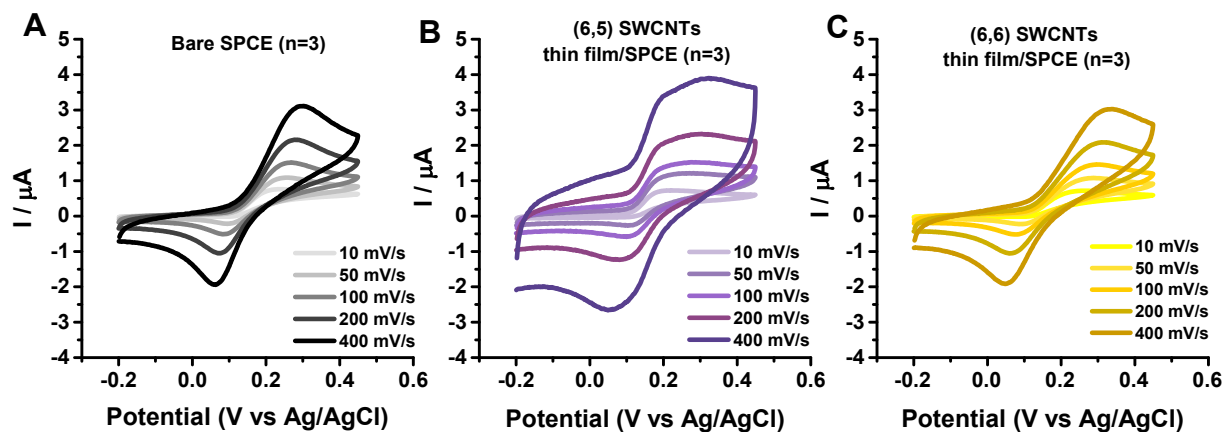

Figure S9. Cyclic voltammograms of Bare SPCEs, (6,6) and (6,5) SWCNTs thin film/SPCEs in DA 50  $\mu\text{M}$  with varying scan rates.

Slopes of  $\text{Log } v$  vs.  $\text{Log } (i_{p,a})$  in Table 2 were calculated from Figure S9.

## K. Calibration plots of (6,6) and (6,5) SWCNTs thin film/SPCEs

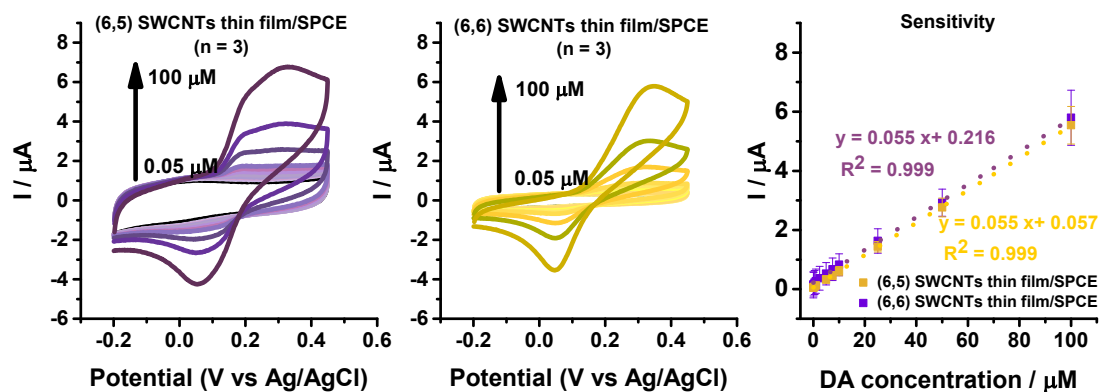

Figure S10. Concentration series of DA (0.05  $\mu\text{M}$  – 100  $\mu\text{M}$ ) with a scan rate of 400 mV/s.

## Reference

1C. Y. Khripin, X. Tu, J. Howarter, J. Fagan and M. Zheng, *Anal. Chem.*, 2012, **84**, 8733–8739.
